# Supplementary material for: Predictive Value of Plasma Big Endothelin-1 in Adverse Events of Patients With Coronary Artery Restenosis and Diabetes Mellitus: Beyond Traditional and Angiographic Risk Factors
Source: PubMed Central journal article supplement (PMC9177997; doi:10.3389/fcvm.2022.854107), 2022-05-26
Supplement: Data_Sheet_1.pdf [file Data_Sheet_1.pdf]

## Supplementary information

**Table S1** Baseline, lesion and intervention characteristics of enrolled and excluded patients

|                                   | Overall<br>(n=2289)   | Enrolled Patients<br>(n=1793) | Excluded Patients<br>(n=496) | P value |
|-----------------------------------|-----------------------|-------------------------------|------------------------------|---------|
| Demographic data                  |                       |                               |                              |         |
| Age, years                        | 60.75±9.81            | 60.79±9.77                    | 60.61±9.95                   | 0.7059  |
| Sex, male, n(%)                   | 1837(80.25)           | 1448(80.76)                   | 389(78.43)                   | 0.2484  |
| BMI, kg/m <sup>2</sup>            | 26.04±3.20            | 26.07±3.14                    | 25.95±3.39                   | 0.4654  |
| Cardiovascular risk factors, n(%) |                       |                               |                              |         |
| Hypertension                      | 1553(67.99)           | 1218(67.97)                   | 335(68.09)                   | 0.9595  |
| Dyslipidemia                      | 2143(98.53)           | 1678(98.36)                   | 465(99.15)                   | 0.2091  |
| Smoking                           | 1445(65.00)           | 1139(65.54)                   | 306(63.09)                   | 0.3187  |
| Other disease, n(%)               |                       |                               |                              |         |
| Stroke                            | 286(12.49)            | 220(12.27)                    | 66(13.31)                    | 0.5367  |
| History of CABG                   | 98(4.28)              | 75(4.18)                      | 23(4.64)                     | 0.6583  |
| Thyroid disease                   | 76(3.32)              | 64(3.57)                      | 12(2.42)                     | 0.2058  |
| Peripheral vascular disease       | 242(10.57)            | 196(10.93)                    | 46(9.27)                     | 0.2881  |
| Examination                       |                       |                               |                              |         |
| Big ET-1                          | 0.24(0.20,0.35)       | 0.24(0.20,0.35)               | 0.28(0.20,0.38)              | 0.2220  |
| TC                                | 3.72(3.20,4.44)       | 3.71(3.20,4.41)               | 3.81(3.20,4.54)              | 0.1858  |
| LDL-C                             | 2.15(1.80,2.73)       | 2.14(1.80,2.71)               | 2.20(1.80,2.81)              | 0.2968  |
| HDL-C                             | 1.06(1.00,1.24)       | 1.06(1.00,1.24)               | 1.04(0.80,1.24)              | 0.5922  |
| TG                                | 1.49(1.00,2.06)       | 1.48(1.00,2.05)               | 1.51(1.20,2.06)              | 0.5319  |
| Creatinine                        | 82.22(72.40,93.15)    | 82.52(72.20,93.71)            | 81.34(72.80,91.17)           | 0.2328  |
| Uric acid                         | 349.53(291.40,408.22) | 350.35(291.20,407.85)         | 343.52(293.80,410.32)        | 0.7348  |
| BNP                               | 112.20(49.80,303.00)  | 113.20(51.80,294.40)          | 104.90(41.80,333.65)         | 0.4270  |

**Table S2.** Unadjusted HR of covariates in all subjects

|              | Reference | β for<br>MACE | Standard Error<br>for MACE | P for<br>MACE | Included for<br>stepwise regression | β for<br>SACE | Standard Error<br>for SACE | P for<br>SACE | Included for<br>stepwise regression |
|--------------|-----------|---------------|----------------------------|---------------|-------------------------------------|---------------|----------------------------|---------------|-------------------------------------|
| Age          |           | 0.002         | 0.009                      | 0.808         |                                     | 0.008         | 0.009                      | 0.371         |                                     |
| Sex          | Female    | -0.3          | 0.2                        | 0.133         | Yes                                 | -0.171        | 0.207                      | 0.408         |                                     |
| Smoking      | No        | -0.002        | 0.181                      | 0.99          |                                     | 0.279         | 0.191                      | 0.145         | Yes                                 |
| BMI          |           | 0.018         | 0.029                      | 0.542         |                                     | -0.003        | 0.03                       | 0.909         |                                     |
| Hypertension | No        | 0.212         | 0.189                      | 0.263         |                                     | -0.053        | 0.181                      | 0.769         |                                     |
| Big ET-1*    |           | 0.181         | 0.149                      | 0.226         |                                     | 0.065         | 0.154                      | 0.673         |                                     |
| TC*          |           | -0.113        | 0.387                      | 0.77          |                                     | -0.402        | 0.383                      | 0.294         |                                     |
| LDL-c*       |           | -0.051        | 0.257                      | 0.844         |                                     | -0.311        | 0.256                      | 0.224         |                                     |

|                                | Reference | $\beta$ for MACE | Standard Error for MACE | P for MACE | Included for stepwise regression | $\beta$ for SACE | Standard Error for SACE | P for SACE | Included for stepwise regression |
|--------------------------------|-----------|------------------|-------------------------|------------|----------------------------------|------------------|-------------------------|------------|----------------------------------|
| HDL-c*                         |           | -0.128           | 0.381                   | 0.737      |                                  | 0.416            | 0.374                   | 0.266      |                                  |
| TG*                            |           | 0.138            | 0.183                   | 0.45       |                                  | -0.06            | 0.184                   | 0.746      |                                  |
| Creatinine*                    |           | 0.607            | 0.37                    | 0.101      | Yes                              | 0.707            | 0.359                   | 0.049      | Yes                              |
| Uric acid*                     |           | -0.349           | 0.334                   | 0.297      |                                  | -0.194           | 0.336                   | 0.564      |                                  |
| TnI*                           |           | 0.067            | 0.053                   | 0.202      |                                  | 0.061            | 0.054                   | 0.256      |                                  |
| BNP*                           |           | 0.172            | 0.069                   | 0.013      | Yes                              | 0.17             | 0.07                    | 0.015      | Yes                              |
| LVDD                           |           | 0.024            | 0.017                   | 0.172      | Yes                              | 0.024            | 0.017                   | 0.177      | Yes                              |
| LVEF                           |           | -0.024           | 0.011                   | 0.036      | Yes                              | -0.014           | 0.012                   | 0.244      |                                  |
| History of Stroke              | No        | 0.139            | 0.247                   | 0.575      |                                  | 0.265            | 0.237                   | 0.264      |                                  |
| History of CABG                | No        | 0.52             | 0.345                   | 0.131      | Yes                              | 0.533            | 0.345                   | 0.123      | Yes                              |
| Reference vessel diameter      |           | -0.026           | 0.198                   | 0.894      |                                  | -0.103           | 0.2                     | 0.607      |                                  |
| Target lesion length           |           | 0.001            | 0.005                   | 0.864      |                                  | 0.005            | 0.004                   | 0.251      |                                  |
| Diameter stenosis rate         |           | 0.018            | 0.01                    | 0.076      | Yes                              | 0.03             | 0.011                   | 0.007      | Yes                              |
| Calcification                  | No        | 0.216            | 0.182                   | 0.235      |                                  | 0.186            | 0.185                   | 0.316      |                                  |
| Occlusion                      | No        | -0.059           | 0.224                   | 0.793      |                                  | 0.135            | 0.216                   | 0.531      |                                  |
| Ostial lesion                  | No        | 0.114            | 0.255                   | 0.656      |                                  | 0.089            | 0.262                   | 0.734      |                                  |
| Thrombus                       | No        | -0.386           | 1.003                   | 0.7        |                                  | -0.374           | 1.004                   | 0.71       |                                  |
| Thyroid disease                | No        | 0.612            | 0.365                   | 0.093      | Yes                              | 0.455            | 0.388                   | 0.241      |                                  |
| Peripheral vascular disease    | No        | 0.32             | 0.242                   | 0.187      | Yes                              | 0.273            | 0.248                   | 0.27       |                                  |
| CKF                            | No        | -0.4             | 1.003                   | 0.69       |                                  | -0.398           | 1.003                   | 0.691      |                                  |
| Asprin                         | No        | -0.273           | 0.418                   | 0.514      |                                  | -0.462           | 0.388                   | 0.234      |                                  |
| P <sub>2</sub> Y <sub>12</sub> | No        | -0.221           | 0.507                   | 0.663      |                                  | -0.219           | 0.508                   | 0.667      |                                  |
| Statin                         | No        | -0.345           | 0.418                   | 0.409      |                                  | -0.347           | 0.418                   | 0.407      |                                  |
| RCA                            | No        | -0.013           | 0.184                   | 0.942      |                                  | -0.073           | 0.187                   | 0.696      |                                  |
| LAD                            | No        | 0.101            | 0.172                   | 0.559      |                                  | 0.088            | 0.173                   | 0.612      |                                  |
| LCX                            | No        | 0.203            | 0.233                   | 0.384      |                                  | 0.268            | 0.229                   | 0.242      |                                  |
| LM                             | No        | 0.466            | 0.456                   | 0.306      |                                  | 0.223            | 0.508                   | 0.66       |                                  |
| Graft bypass                   | No        | -12.008          | 510.005                 | 0.981      |                                  | -12.008          | 513.858                 | 0.981      |                                  |
| DES intervention               | No        | -0.135           | 0.172                   | 0.434      |                                  | -0.08            | 0.173                   | 0.646      |                                  |

|                             | Reference    | $\beta$ for MACE | Standard Error for MACE | P for MACE | Included for stepwise regression | $\beta$ for SACE | Standard Error for SACE | P for SACE | Included for stepwise regression |
|-----------------------------|--------------|------------------|-------------------------|------------|----------------------------------|------------------|-------------------------|------------|----------------------------------|
| Non-ISR lesion intervention | No           | 0.08             | 0.193                   | 0.677      |                                  | 0.05             | 0.195                   | 0.796      |                                  |
| ACS                         | No           | 0.047            | 0.172                   | 0.786      |                                  | 0.156            | 0.172                   | 0.365      |                                  |
| Pre MI                      | No           | 0.138            | 0.176                   | 0.434      |                                  | -0.12            | 0.184                   | 0.514      |                                  |
| ISR duration                |              | -0.028           | 0.037                   | 0.44       |                                  | -0.022           | 0.036                   | 0.542      |                                  |
| Early ISR                   | No           | 0.659            | 0.365                   | 0.071      | Yes                              | 0.501            | 0.388                   | 0.197      | Yes                              |
| ISR Type2                   | Type 1       | -0.117           | 0.404                   | 0.772      |                                  | -0.287           | 0.408                   | 0.482      |                                  |
| ISR Type3                   | Type 1       | -0.101           | 0.402                   | 0.802      |                                  | -0.017           | 0.4                     | 0.967      |                                  |
| ISR Type4                   | Type 1       | -0.113           | 0.428                   | 0.791      |                                  | 0.014            | 0.423                   | 0.974      |                                  |
| Pre TIMI 1                  | TIMI 0       | 0.292            | 0.423                   | 0.489      |                                  | 0.359            | 0.398                   | 0.367      |                                  |
| Pre TIMI 2                  | TIMI 0       | -0.002           | 0.348                   | 0.995      |                                  | -0.282           | 0.369                   | 0.445      |                                  |
| Pre TIMI 3                  | TIMI 0       | -0.186           | 0.217                   | 0.391      |                                  | -0.281           | 0.212                   | 0.184      | Yes                              |
| Defuse lesion               | Limitation   | 0.265            | 0.323                   | 0.413      |                                  | 0.574            | 0.353                   | 0.104      | Yes                              |
| Concentric lesion           | Eccentricity | -0.007           | 0.242                   | 0.976      |                                  | -0.131           | 0.253                   | 0.605      |                                  |
| Angulated lesion            | No           | 0.34             | 0.183                   | 0.064      | Yes                              | 0.425            | 0.182                   | 0.019      | Yes                              |
| Number of lesion 2          | 1            | 0.013            | 0.211                   | 0.951      |                                  | 0.012            | 0.211                   | 0.954      |                                  |
| Number of lesion 3          | 1            | 0.371            | 0.368                   | 0.313      |                                  | 0.227            | 0.391                   | 0.562      |                                  |

\*These variables were natural log-transformed

**Table S3.** Unadjusted HR of covariates in diabetic patients

|              | Reference | $\beta$ for MACE | Standard Error for MACE | P for MACE | Included for stepwise regression | $\beta$ for SACE | Standard Error for SACE | P for SACE | Included for stepwise regression |
|--------------|-----------|------------------|-------------------------|------------|----------------------------------|------------------|-------------------------|------------|----------------------------------|
| Age          |           | 0.007            | 0.015                   | 0.651      |                                  | 0.015            | 0.015                   | 0.348      |                                  |
| Sex          | Female    | -0.117           | 0.328                   | 0.722      |                                  | -0.077           | 0.341                   | 0.821      |                                  |
| Smoking      | No        | -0.256           | 0.279                   | 0.359      |                                  | -0.02            | 0.295                   | 0.946      |                                  |
| BMI          |           | 0.027            | 0.048                   | 0.57       |                                  | 0.019            | 0.05                    | 0.7        |                                  |
| Hypertension | No        | -0.204           | 0.299                   | 0.494      |                                  | -0.379           | 0.298                   | 0.204      |                                  |
| Big ET-1*    |           | 0.616            | 0.195                   | 0.002      | Yes                              | 0.569            | 0.202                   | 0.005      | Yes                              |
| TC*          |           | 1.172            | 0.579                   | 0.043      | Yes                              | -0.071           | 0.633                   | 0.911      |                                  |
| LDL-c*       |           | 0.904            | 0.394                   | 0.022      | Yes                              | 0.028            | 0.42                    | 0.947      |                                  |

|                                | Reference | $\beta$ for MACE | Standard Error for MACE | P for MACE | Included for stepwise regression | $\beta$ for SACE | Standard Error for SACE | P for SACE | Included for stepwise regression |
|--------------------------------|-----------|------------------|-------------------------|------------|----------------------------------|------------------|-------------------------|------------|----------------------------------|
| HDL-c*                         |           | -0.601           | 0.621                   | 0.333      |                                  | -0.212           | 0.622                   | 0.733      |                                  |
| TG*                            |           | 0.299            | 0.281                   | 0.288      |                                  | 0.054            | 0.296                   | 0.856      |                                  |
| Creatinine*                    |           | 0.748            | 0.478                   | 0.117      | Yes                              | 1.085            | 0.398                   | 0.006      | Yes                              |
| Uric acid*                     |           | -0.393           | 0.511                   | 0.442      |                                  | -0.059           | 0.543                   | 0.913      |                                  |
| TnI*                           |           | 0.111            | 0.073                   | 0.13       | Yes                              | 0.079            | 0.078                   | 0.307      |                                  |
| BNP*                           |           | 0.28             | 0.104                   | 0.007      | Yes                              | 0.319            | 0.109                   | 0.003      | Yes                              |
| LVDD                           |           | -0.017           | 0.031                   | 0.583      |                                  | -0.007           | 0.032                   | 0.827      |                                  |
| LVEF                           |           | -0.018           | 0.018                   | 0.323      |                                  | -0.011           | 0.02                    | 0.573      |                                  |
| History of Stroke              | No        | 0.048            | 0.384                   | 0.901      |                                  | 0.092            | 0.386                   | 0.812      |                                  |
| History of CABG                | No        | 1.002            | 0.434                   | 0.021      | Yes                              | 1.067            | 0.435                   | 0.014      | Yes                              |
| Reference vessel diameter      |           | 0.563            | 0.299                   | 0.06       | Yes                              | 0.542            | 0.307                   | 0.078      | Yes                              |
| Target lesion length           |           | -0.001           | 0.008                   | 0.905      |                                  | 0.001            | 0.008                   | 0.929      |                                  |
| Diameter stenosis rate         |           | 0.012            | 0.016                   | 0.441      |                                  | 0.03             | 0.018                   | 0.1        | Yes                              |
| Calcification                  | No        | 0.215            | 0.289                   | 0.457      |                                  | -0.002           | 0.302                   | 0.994      |                                  |
| Occlusion                      | No        | -0.202           | 0.368                   | 0.583      |                                  | 0.082            | 0.359                   | 0.818      |                                  |
| Ostial lesion                  | No        | -0.119           | 0.436                   | 0.785      |                                  | 0.202            | 0.412                   | 0.624      |                                  |
| Thrombus                       | No        | 0.356            | 1.01                    | 0.725      |                                  | 0.448            | 1.012                   | 0.658      |                                  |
| Thyroid disease                | No        | 1.045            | 0.52                    | 0.045      | Yes                              | 0.299            | 0.722                   | 0.679      |                                  |
| Peripheral vascular disease    | No        | 0.48             | 0.366                   | 0.19       | Yes                              | 0.569            | 0.368                   | 0.122      | Yes                              |
| CKF                            | No        | 0.232            | 1.01                    | 0.819      |                                  | 0.276            | 1.011                   | 0.785      |                                  |
| Asprin                         | No        | 0.173            | 0.722                   | 0.811      |                                  | 0.106            | 0.723                   | 0.883      |                                  |
| P <sub>2</sub> Y <sub>12</sub> | No        | 0.351            | 1.009                   | 0.728      |                                  | 0.3              | 1.01                    | 0.767      |                                  |
| Statin                         | No        | -0.181           | 0.721                   | 0.802      |                                  | -0.218           | 0.722                   | 0.763      |                                  |
| RCA                            | No        | 0.12             | 0.282                   | 0.669      |                                  | 0.114            | 0.29                    | 0.695      |                                  |
| LAD                            | No        | 0.07             | 0.275                   | 0.799      |                                  | -0.234           | 0.293                   | 0.425      |                                  |
| LCX                            | No        | 0.44             | 0.351                   | 0.21       |                                  | 0.648            | 0.341                   | 0.058      | Yes                              |
| LM                             | No        | 0.458            | 0.721                   | 0.525      |                                  | 0.501            | 0.722                   | 0.488      |                                  |
| Graft bypass                   | No        | -12.01           | 716.627                 | 0.987      |                                  | -12.01           | 732.636                 | 0.987      |                                  |
| DES intervention               | No        | 0.163            | 0.284                   | 0.566      |                                  | 0.07             | 0.289                   | 0.809      |                                  |

|                             | Reference    | $\beta$ for MACE | Standard Error for MACE | P for MACE | Included for stepwise regression | $\beta$ for SACE | Standard Error for SACE | P for SACE | Included for stepwise regression |
|-----------------------------|--------------|------------------|-------------------------|------------|----------------------------------|------------------|-------------------------|------------|----------------------------------|
| Non-ISR lesion intervention | No           | 0.468            | 0.283                   | 0.099      | Yes                              | 0.574            | 0.289                   | 0.047      | Yes                              |
| ACS                         | No           | -0.006           | 0.276                   | 0.983      |                                  | 0.101            | 0.283                   | 0.721      |                                  |
| Pre MI                      | No           | 0.475            | 0.275                   | 0.085      | Yes                              | -0.01            | 0.295                   | 0.974      |                                  |
| ISR duration                |              | 0.022            | 0.055                   | 0.697      |                                  | 0.029            | 0.056                   | 0.61       |                                  |
| Early ISR                   | No           | 0.986            | 0.471                   | 0.036      | Yes                              | 0.742            | 0.522                   | 0.155      | Yes                              |
| ISR Type2                   | Type 1       | 0.362            | 0.741                   | 0.626      |                                  | -0.326           | 0.63                    | 0.605      |                                  |
| ISR Type3                   | Type 1       | 0.382            | 0.738                   | 0.605      |                                  | -0.111           | 0.618                   | 0.857      |                                  |
| ISR Type4                   | Type 1       | 0.244            | 0.781                   | 0.755      |                                  | -0.084           | 0.659                   | 0.898      |                                  |
| Pre TIMI 1                  | TIMI 0       | 0.854            | 0.592                   | 0.149      | Yes                              | 0.842            | 0.592                   | 0.155      | Yes                              |
| Pre TIMI 2                  | TIMI 0       | 0.143            | 0.56                    | 0.799      |                                  | -0.469           | 0.675                   | 0.487      |                                  |
| Pre TIMI 3                  | TIMI 0       | -0.109           | 0.359                   | 0.762      |                                  | -0.154           | 0.361                   | 0.67       |                                  |
| Defuse lesion               | Limitation   | 1.102            | 0.739                   | 0.135      | Yes                              | 1.825            | 1.026                   | 0.075      | Yes                              |
| Concentric lesion           | Eccentricity | -0.19            | 0.434                   | 0.662      |                                  | -0.337           | 0.471                   | 0.474      |                                  |
| Angulated lesion            | No           | 0.597            | 0.28                    | 0.033      | Yes                              | 0.778            | 0.284                   | 0.006      | Yes                              |
| Number of lesion 2          | 1            | 0.394            | 0.311                   | 0.205      |                                  | 0.565            | 0.31                    | 0.068      | Yes                              |
| Number of lesion 3          | 1            | 0.725            | 0.48                    | 0.131      | Yes                              | 0.611            | 0.533                   | 0.252      |                                  |

\*These variables were natural log-transformed

**Table S4.** Unadjusted HR of covariates in nondiabetic patients

|              | Reference | $\beta$ for MACE | Standard Error for MACE | P for MACE | Included for stepwise regression | $\beta$ for SACE | Standard Error for SACE | P for SACE | Included for stepwise regression |
|--------------|-----------|------------------|-------------------------|------------|----------------------------------|------------------|-------------------------|------------|----------------------------------|
| Age          |           | 0.001            | 0.011                   | 0.944      |                                  | 0.006            | 0.011                   | 0.567      |                                  |
| Sex          | Female    | -0.442           | 0.253                   | 0.08       | Yes                              | -0.261           | 0.26                    | 0.315      |                                  |
| Smoking      | No        | 0.158            | 0.242                   | 0.515      |                                  | 0.459            | 0.256                   | 0.073      | Yes                              |
| BMI          |           | 0.018            | 0.036                   | 0.631      |                                  | -0.008           | 0.037                   | 0.829      |                                  |
| Hypertension | No        | 0.514            | 0.245                   | 0.036      | Yes                              | 0.199            | 0.229                   | 0.384      |                                  |
| Big ET-1*    |           | -0.173           | 0.212                   | 0.415      |                                  | -0.296           | 0.212                   | 0.162      | Yes                              |
| TC*          |           | -1.018           | 0.498                   | 0.041      | Yes                              | -0.614           | 0.477                   | 0.198      | Yes                              |
| LDL-c*       |           | -0.69            | 0.322                   | 0.032      | Yes                              | -0.517           | 0.32                    | 0.106      | Yes                              |

|                                | Reference | $\beta$ for MACE | Standard Error for MACE | P for MACE | Included for stepwise regression | $\beta$ for SACE | Standard Error for SACE | P for SACE | Included for stepwise regression |
|--------------------------------|-----------|------------------|-------------------------|------------|----------------------------------|------------------|-------------------------|------------|----------------------------------|
| HDL-c*                         |           | 0.059            | 0.489                   | 0.904      |                                  | 0.669            | 0.475                   | 0.159      | Yes                              |
| TG*                            |           | 0.049            | 0.24                    | 0.839      |                                  | -0.103           | 0.235                   | 0.661      |                                  |
| Creatinine*                    |           | 0.443            | 0.569                   | 0.436      |                                  | 0.155            | 0.558                   | 0.782      |                                  |
| Uric acid*                     |           | -0.435           | 0.45                    | 0.334      |                                  | -0.455           | 0.435                   | 0.297      |                                  |
| TnI*                           |           | 0.021            | 0.076                   | 0.779      |                                  | 0.042            | 0.074                   | 0.568      |                                  |
| BNP*                           |           | 0.101            | 0.092                   | 0.275      |                                  | 0.087            | 0.09                    | 0.332      |                                  |
| LVDD                           |           | 0.045            | 0.021                   | 0.029      | Yes                              | 0.038            | 0.021                   | 0.066      | Yes                              |
| LVEF                           |           | -0.029           | 0.014                   | 0.047      | Yes                              | -0.017           | 0.015                   | 0.253      |                                  |
| History of Stroke              | No        | 0.241            | 0.324                   | 0.457      |                                  | 0.43             | 0.301                   | 0.154      | Yes                              |
| History of CABG                | No        | -0.019           | 0.588                   | 0.974      |                                  | -0.037           | 0.588                   | 0.949      |                                  |
| Reference vessel diameter      |           | -0.467           | 0.262                   | 0.075      | Yes                              | -0.579           | 0.262                   | 0.027      | Yes                              |
| Target lesion length           |           | 0.002            | 0.006                   | 0.769      |                                  | 0.007            | 0.005                   | 0.181      | Yes                              |
| Diameter stenosis rate         |           | 0.023            | 0.013                   | 0.09       | Yes                              | 0.031            | 0.014                   | 0.026      | Yes                              |
| Calcification                  | No        | 0.226            | 0.235                   | 0.337      |                                  | 0.313            | 0.235                   | 0.182      | Yes                              |
| Occlusion                      | No        | 0.026            | 0.283                   | 0.928      |                                  | 0.172            | 0.271                   | 0.526      |                                  |
| Ostial lesion                  | No        | 0.26             | 0.316                   | 0.41       |                                  | 0.02             | 0.34                    | 0.954      |                                  |
| Thrombus                       | No        | -13.019          | 760.011                 | 0.986      |                                  | -13.019          | 753.65                  | 0.986      |                                  |
| Thyroid disease                | No        | 0.275            | 0.513                   | 0.592      |                                  | 0.495            | 0.461                   | 0.283      |                                  |
| Peripheral vascular disease    | No        | 0.213            | 0.324                   | 0.512      |                                  | 0.079            | 0.337                   | 0.814      |                                  |
| CKF                            | No        | -12.012          | 513.458                 | 0.981      |                                  | -12.012          | 508.229                 | 0.981      |                                  |
| Asprin                         | No        | -0.644           | 0.513                   | 0.209      |                                  | -0.889           | 0.461                   | 0.054      | Yes                              |
| P <sub>2</sub> Y <sub>12</sub> | No        | -0.53            | 0.588                   | 0.367      |                                  | -0.495           | 0.588                   | 0.399      |                                  |
| Statin                         | No        | -0.436           | 0.513                   | 0.395      |                                  | -0.413           | 0.512                   | 0.42       |                                  |
| RCA                            | No        | -0.096           | 0.245                   | 0.696      |                                  | -0.184           | 0.248                   | 0.458      |                                  |
| LAD                            | No        | 0.117            | 0.221                   | 0.595      |                                  | 0.27             | 0.217                   | 0.214      |                                  |
| LCX                            | No        | 0.035            | 0.312                   | 0.91       |                                  | 0.006            | 0.312                   | 0.985      |                                  |
| LM                             | No        | 0.476            | 0.588                   | 0.418      |                                  | 0.004            | 0.716                   | 0.995      |                                  |
| Graft bypass                   | No        | -11.006          | 462.085                 | 0.981      |                                  | -11.006          | 461.29                  | 0.981      |                                  |
| DES intervention               | No        | -0.319           | 0.22                    | 0.147      | Yes                              | -0.166           | 0.218                   | 0.445      |                                  |

|                             | Reference    | $\beta$ for MACE | Standard Error for MACE | P for MACE | Included for stepwise regression | $\beta$ for SACE | Standard Error for SACE | P for SACE | Included for stepwise regression |
|-----------------------------|--------------|------------------|-------------------------|------------|----------------------------------|------------------|-------------------------|------------|----------------------------------|
| Non-ISR lesion intervention | No           | -0.209           | 0.272                   | 0.443      |                                  | -0.32            | 0.278                   | 0.249      |                                  |
| ACS                         | No           | 0.078            | 0.22                    | 0.723      |                                  | 0.186            | 0.217                   | 0.39       |                                  |
| Pre MI                      | No           | -0.088           | 0.234                   | 0.709      |                                  | -0.176           | 0.235                   | 0.455      |                                  |
| ISR duration                |              | -0.064           | 0.048                   | 0.19       | Yes                              | -0.054           | 0.048                   | 0.258      |                                  |
| Early ISR                   | No           | 0.326            | 0.588                   | 0.579      |                                  | 0.298            | 0.588                   | 0.612      |                                  |
| ISR Type2                   | Type 1       | -0.421           | 0.483                   | 0.384      |                                  | -0.318           | 0.537                   | 0.554      |                                  |
| ISR Type3                   | Type 1       | -0.408           | 0.481                   | 0.396      |                                  | -0.011           | 0.526                   | 0.983      |                                  |
| ISR Type4                   | Type 1       | -0.345           | 0.512                   | 0.501      |                                  | 0.028            | 0.553                   | 0.96       |                                  |
| Pre TIMI 1                  | TIMI 0       | -0.176           | 0.624                   | 0.778      |                                  | 0.008            | 0.548                   | 0.988      |                                  |
| Pre TIMI 2                  | TIMI 0       | -0.105           | 0.445                   | 0.814      |                                  | -0.22            | 0.439                   | 0.617      |                                  |
| Pre TIMI 3                  | TIMI 0       | -0.226           | 0.272                   | 0.405      |                                  | -0.358           | 0.262                   | 0.171      | Yes                              |
| Defuse lesion               | Limitation   | -0.066           | 0.362                   | 0.855      |                                  | 0.211            | 0.377                   | 0.575      |                                  |
| Concentric lesion           | Eccentricity | 0.068            | 0.293                   | 0.817      |                                  | -0.058           | 0.301                   | 0.848      |                                  |
| Angulated lesion            | No           | 0.165            | 0.245                   | 0.501      |                                  | 0.192            | 0.241                   | 0.426      |                                  |
| Number of lesion 2          | 1            | -0.261           | 0.294                   | 0.375      |                                  | -0.384           | 0.302                   | 0.204      |                                  |
| Number of lesion 3          | 1            | 0.082            | 0.59                    | 0.889      |                                  | 0.02             | 0.59                    | 0.973      |                                  |

\*These variables were natural log-transformed

**Table S5.** Results of stepwise Cox regression for MACE and SACE

| Variables (Overall)    | $\beta$ (Overall) | Standard Error (Overall) | P (Overall) | Variables (DM)   | $\beta$ (DM) | Standard Error (DM) | P (DM) | Variables (Non-DM) | $\beta$ (Non-DM) | Standard Error (Non-DM) | P (Non-DM) |
|------------------------|-------------------|--------------------------|-------------|------------------|--------------|---------------------|--------|--------------------|------------------|-------------------------|------------|
| <b>MACE</b>            |                   |                          |             |                  |              |                     |        |                    |                  |                         |            |
| BNP*                   | 0.275             | 0.093                    | 0.003       | Angulated lesion | 0.927        | 0.411               | 0.024  | LVEF               | -0.03            | 0.018                   | 0.09       |
| Diameter stenosis rate | 0.032             | 0.016                    | 0.042       | History of CABG  | 1.635        | 0.53                | 0.002  | ISR duration       | -0.185           | 0.065                   | 0.005      |
| Thyroid disease        | 1.402             | 0.404                    | 0.001       | Big ET-1*        | 0.812        | 0.293               | 0.006  | Hypertension       | 0.683            | 0.353                   | 0.053      |

| Variables (Overall)    | $\beta$ (Overall) | Standard Error (Overall) | P (Overall) | Variables (DM)              | $\beta$ (DM) | Standard Error (DM) | P (DM) | Variables (Non-DM)                             | $\beta$ (Non-DM) | Standard Error (Non-DM) | P (Non-DM) |
|------------------------|-------------------|--------------------------|-------------|-----------------------------|--------------|---------------------|--------|------------------------------------------------|------------------|-------------------------|------------|
|                        |                   |                          |             | LDL-c*                      | 1.629        | 0.559               | 0.004  | DES intervention                               | -0.594           | 0.316                   | 0.06       |
|                        |                   |                          |             | Reference vessel diameter   | 1.211        | 0.449               | 0.007  | TC*                                            | -1.56            | 0.637                   | 0.014      |
|                        |                   |                          |             | Thyroid disease             | 1.661        | 0.638               | 0.009  | Diameter stenosis rate                         | 0.045            | 0.019                   | 0.016      |
| <b>SACE</b>            |                   |                          |             |                             |              |                     |        |                                                |                  |                         |            |
| BNP*                   | 0.256             | 0.092                    | 0.005       | Angulated lesion            | 0.655        | 0.34                | 0.054  | HDL-c*                                         | 1.518            | 0.642                   | 0.018      |
| Diameter stenosis rate | 0.053             | 0.017                    | 0.002       | History of CABG             | 1.052        | 0.489               | 0.032  | TC*                                            | -1.318           | 0.666                   | 0.048      |
|                        | .                 | .                        | .           | Early ISR                   | 1.096        | 0.615               | 0.075  | Reference vessel diameter Target lesion length | -0.748           | 0.358                   | 0.037      |
|                        | .                 | .                        | .           | Big ET-1*                   | 1.048        | 0.243               | 0      | Diameter stenosis rate                         | 0.016            | 0.007                   | 0.022      |
|                        | .                 | .                        | .           | Non-ISR lesion intervention | 0.811        | 0.349               | 0.02   |                                                | 0.04             | 0.02                    | 0.041      |

\*These variables were natural log-transformed

**Table S6** Cox multivariate proportional hazards models for the prognosis of diabetic patients

|                             | HR(95% CI)       | P value |
|-----------------------------|------------------|---------|
| <b>MACE</b>                 |                  |         |
| Big ET-1 Tertile1           | Reference        | -       |
| Big ET -1 Tertile2          | 1.24 (0.51-3.05) | 0.634   |
| Big ET -1 Tertile3          | 2.60 (1.16-5.81) | 0.02    |
| Age                         | 1.00 (0.97-1.03) | 0.881   |
| Sex                         | 1.04 (0.52-2.09) | 0.91    |
| Angulated lesion            | 1.45 (0.81-2.58) | 0.211   |
| History of CABG             | 2.45 (1.02-5.91) | 0.046   |
| LDL-c*                      | 2.63 (1.14-6.10) | 0.024   |
| Reference vessel diameter   | 1.86 (1.02-3.40) | 0.043   |
| Thyroid disease             | 2.78 (0.99-7.81) | 0.053   |
| <b>Secondary end points</b> |                  |         |
| Big ET-1 Tertile1           | Reference        | -       |



|                             | HR(95% CI)       | P value |
|-----------------------------|------------------|---------|
| Big ET -1 Tertile2          | 0.97 (0.40-2.37) | 0.948   |
| Big ET -1 Tertile3          | 2.00 (0.91-4.41) | 0.084   |
| Age                         | 1.01 (0.98-1.05) | 0.472   |
| Sex                         | 1.03 (0.50-2.13) | 0.944   |
| Angulated lesion            | 2.04 (1.12-3.71) | 0.019   |
| History of CABG             | 3.03 (1.25-7.34) | 0.014   |
| Early ISR                   | 3.02 (1.06-8.57) | 0.038   |
| Non-ISR lesion intervention | 2.01 (1.10-3.69) | 0.024   |

\*These variables were natural log-transformed

**Table S7** Cox multivariate proportional hazards models for the prognosis of nondiabetic patients

|                           | HR(95% CI)       | P value |
|---------------------------|------------------|---------|
| MACE                      |                  |         |
| Big ET-1 Tertile1         | Reference        | -       |
| Big ET -1 Tertile2        | 1.62 (0.90-2.90) | 0.107   |
| Big ET -1 Tertile3        | 0.85 (0.40-1.81) | 0.668   |
| Age                       | 1.00 (0.97-1.03) | 0.839   |
| Sex                       | 0.70 (0.36-1.33) | 0.273   |
| LVEF                      | 0.97 (0.93-1.00) | 0.072   |
| ISR duration              | 0.91 (0.80-1.03) | 0.143   |
| Hypertension              | 1.31 (0.75-2.27) | 0.338   |
| DES intervention          | 0.53 (0.31-0.88) | 0.015   |
| TC*                       | 0.37 (0.13-1.08) | 0.069   |
| Diameter stenosis rate    | 1.03 (1.00-1.06) | 0.05    |
| Secondary end points      |                  |         |
| Big ET-1 Tertile1         | Reference        | -       |
| Big ET -1 Tertile2        | 1.45 (0.83-2.53) | 0.191   |
| Big ET -1 Tertile3        | 0.76 (0.36-1.61) | 0.474   |
| Age                       | 1.00 (0.97-1.02) | 0.715   |
| Sex                       | 0.84 (0.45-1.55) | 0.569   |
| HDL-c*                    | 2.88 (0.91-9.13) | 0.072   |
| TC*                       | 0.46 (0.16-1.36) | 0.161   |
| Reference vessel diameter | 0.54 (0.30-0.97) | 0.038   |
| Target lesion length      | 1.01 (1.00-1.02) | 0.07    |
| Diameter stenosis rate    | 1.03 (1.00-1.06) | 0.096   |

\*These variables were natural log-transformed

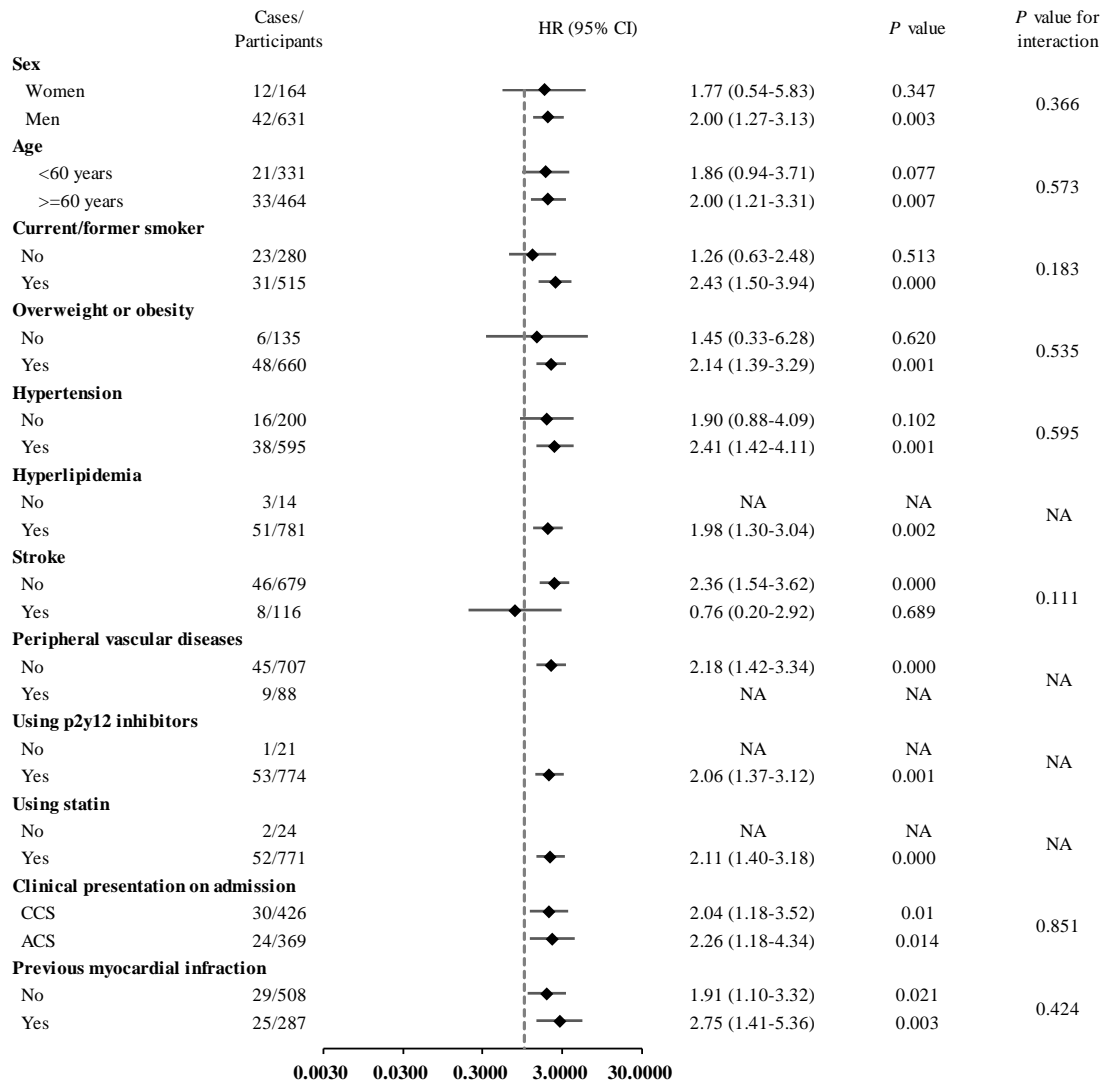

**Fig. S1** Cox proportional hazards analysis between big ET-1 and MACEs in various stratifications.

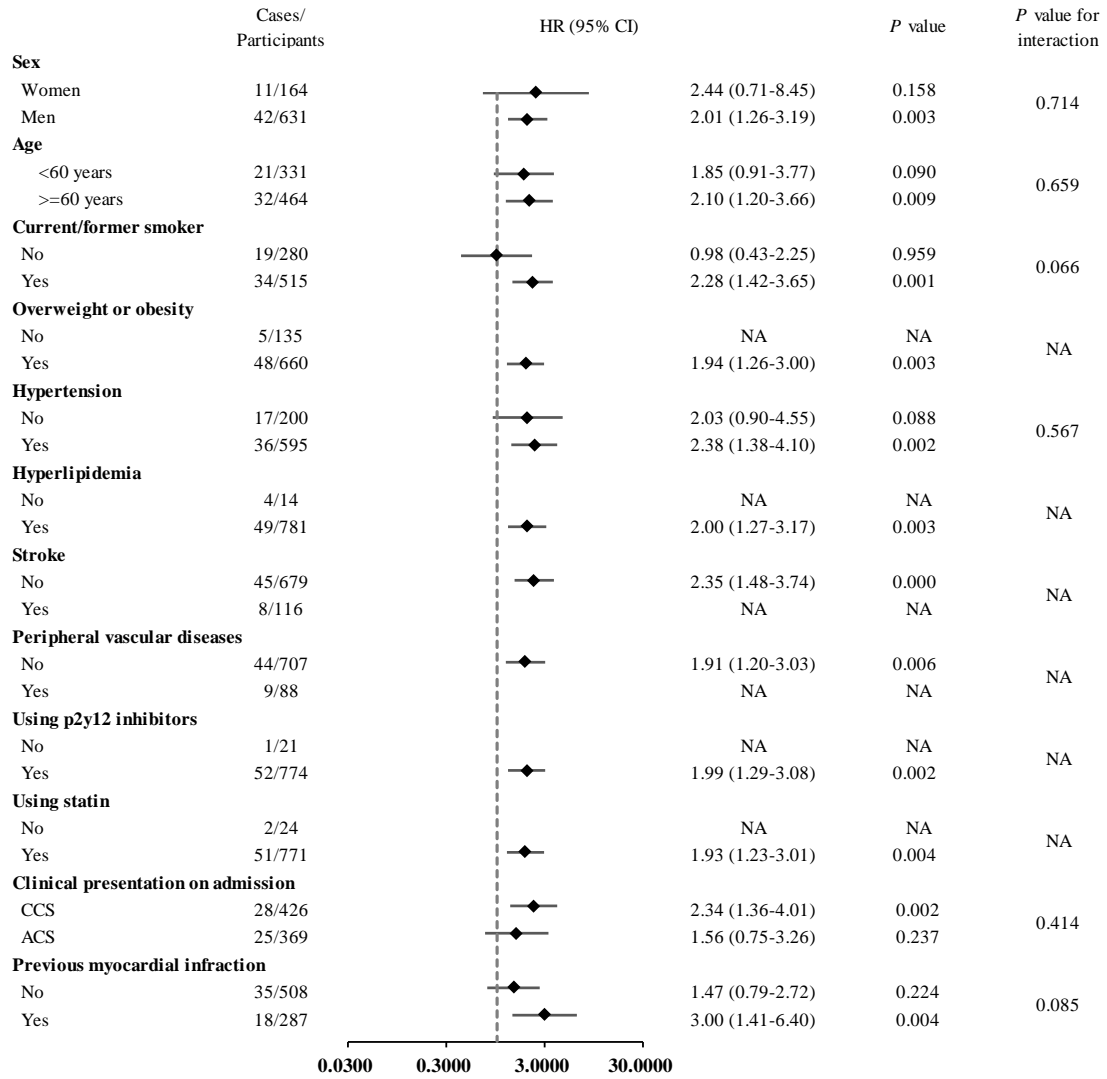

**Fig. S2** Cox proportional hazards analysis between big ET-1 and secondary endpoints in various stratifications.
